# Supplementary material for: Secukinumab provides sustained improvement in signs and symptoms and low radiographic progression in patients with psoriatic arthritis: 2-year (end-of-study) results from the FUTURE 5 study
Source: HighWire-hosted journal article supplement (doi:10.1136/rmdopen-2021-001600), 2021-07-01
Supplement: rmdopen-2021-001600supp001_data_supplement.pdf [file rmdopen-2021-001600supp001_data_supplement.pdf]

## Supplemental data

**Supplementary table 1** Summary of clinical efficacy of placebo switchers\* through Week 104 in overall population

| Efficacy endpoints                          | Week 52                   |                           | Week 104                  |                                      |
|---------------------------------------------|---------------------------|---------------------------|---------------------------|--------------------------------------|
|                                             | Placebo-300 mg<br>(N=153) | Placebo-150 mg<br>(N=153) | Placebo-300 mg<br>(N=153) | Placebo-150 mg-<br>300 mg<br>(N=153) |
| ACR20 response, % (n)                       | 74.6 (126)                | 71.9 (128)                | 73.5 (117)                | 76.4 (123)                           |
| ACR50 response, % (n)                       | 50 (126)                  | 46.1 (128)                | 53.8 (117)                | 53.7 (123)                           |
| ACR70 response, % (n)                       | 29.4 (126)                | 28.1 (128)                | 37.6 (117)                | 36.6 (123)                           |
| PASI 90 response <sup>β</sup> , % (n)       | 53.8 (65)                 | 47.5 (61)                 | 66.7 (63)                 | 57.6 (59)                            |
| PASI 100 response <sup>β</sup> , % (n)      | 32.3 (65)                 | 36.1 (61)                 | 50.8 (63)                 | 42.4 (59)                            |
| DAS28-CRP score, mean change from BL±SD (n) | -2.0±1.2 (125)            | -1.8±1.3 (128)            | -2.2±1.3 (116)            | -1.9±1.3 (121)                       |
| HAQ-DI score, mean change from BL±SD (n)    | -0.5±0.5 (127)            | -0.5±0.6 (127)            | -0.6±0.5 (119)            | -0.5±0.6 (122)                       |
| Enthesitis resolution <sup>#</sup> , % (n)  | 69 (71)                   | 67.1 (79)                 | 73.1 (67)                 | 69.7 (76)                            |
| Dactylitis resolution <sup>#</sup> , % (n)  | 84.6 (39)                 | 73.2 (56)                 | 87.5 (40)                 | 84.9 (53)                            |

Results are reported as observed data.

\*Placebo switchers are patients originally randomized to placebo who switched to secukinumab. n, number of patients in the treatment group with evaluation at Weeks 52 and 104; N, number of randomized patients; %, percentage of responses. ACR, American College of Rheumatology response criteria; BL, baseline; DAS28-CRP, 28-joint Disease Activity Score using C reactive protein; HAQ-DI,

HAQ-Disability Index; PASI, Psoriasis Area and Severity Index; SD, standard deviation.

<sup>§</sup>150 mg groups include patients who escalated to 300 mg.

<sup>β</sup>Analysis performed in randomized patients with psoriasis (psoriasis subset) affecting  $\geq 3\%$  body surface area at baseline; N=78 (placebo-300 mg), 74 (placebo-150 mg).

<sup>#</sup>Resolution of enthesitis and dactylitis are shown for patients with the symptoms at baseline.

**Supplementary table 2** Summary of clinical efficacy at Week 104 by prior anti-TNF therapy status

| Efficacy endpoints                          | Anti-TNF-naïve           |                          |                                     | Anti-TNF-IR             |                         |                                    |
|---------------------------------------------|--------------------------|--------------------------|-------------------------------------|-------------------------|-------------------------|------------------------------------|
|                                             | 300 mg<br>N=154<br>% (n) | 150 mg<br>N=153<br>% (n) | 150 mg no<br>load<br>N=157<br>% (n) | 300 mg<br>N=68<br>% (n) | 150 mg<br>N=67<br>% (n) | 150 mg no<br>load<br>N=65<br>% (n) |
| <b>ACR20 response</b>                       | 78.1 (137)               | 81.8 (132)               | 80.8 (125)                          | 74 (50)                 | 72.1 (43)               | 69.8 (43)                          |
| <b>ACR50 response</b>                       | 54 (137)                 | 59.8 (132)               | 61.6 (125)                          | 46 (50)                 | 30.2 (43)               | 46.5 (43)                          |
| <b>PASI 90 response</b>                     | 70.6 (68)                | 65.5 (84)                | 65.8 (73)                           | 69 (29)                 | 31.6 (19)               | 50 (18)                            |
| <b>DAS28-CRP score, mean change from BL</b> | -2.1 (133)               | -2.1 (129)               | -2.2 (123)                          | -2.1 (49)               | -1.9 (43)               | -2.1 (42)                          |
| <b>HAQ-DI score, mean change from BL</b>    | -0.6 (137)               | -0.6 (134)               | -0.7 (126)                          | -0.6 (49)               | -0.6 (43)               | -0.5 (43)                          |
| <b>Enthesitis resolution</b>                | 79.5 (88)                | 82.4 (85)                | 72.5 (69)                           | 73.3 (30)               | 75 (32)                 | 61.5 (26)                          |
| <b>Dactylitis resolution</b>                | 87.5 (48)                | 86 (43)                  | 90.3 (62)                           | 68.8 (16)               | 84.2 (19)               | 84.6 (13)                          |

Results are reported as observed data.

n, number of patients in the treatment group with evaluation at Week 104; %, percentage of responses.

ACR, American College of Rheumatology response criteria; BL, baseline; DAS28-CRP, 28-joint Disease Activity Score using C reactive protein; HAQ-DI, HAQ-Disability Index; IR, inadequate response; PASI, Psoriasis Area and Severity Index; TNF, tumor necrosis factor.

150 mg and 150 mg no load groups include patients who escalated to 300 mg.

**Supplementary table 3** ACR responses up to 40 weeks after dose escalation from secukinumab 150 mg to 300 mg in anti-TNF-naïve patients

| ACR response                        | Before          | After dose-escalation |             |             |             |
|-------------------------------------|-----------------|-----------------------|-------------|-------------|-------------|
|                                     | dose-escalation | 12-16 weeks           | 20-24 weeks | 28-32 weeks | 36-40 weeks |
|                                     | (%)             | (%)                   | (%)         | (%)         | (%)         |
| <b>ACR &lt; 20</b><br>(No response) | 36              | 24                    | 26          | 25          | 27          |
| <b>20 ≤ ACR &lt; 50</b>             | 36              | 28                    | 28          | 33          | 28          |
| <b>50 ≤ ACR &lt; 70</b>             | 11              | 25                    | 26          | 18          | 23          |
| <b>ACR ≥ 70</b>                     | 18              | 24                    | 21          | 25          | 23          |

'Before dose-escalation' was defined as the last assessment on or before the patient took the escalated dose. Number of patients included in the analysis (N=101).

ACR, American College of Rheumatology response criteria; TNF, tumor necrosis factor.

**Supplementary table 4** ACR responses up to 40 weeks after dose escalation from secukinumab 150 mg to 300 mg in anti-TNF-IR patients

| ACR response                         | Before<br>dose-<br>escalation | After dose-escalation |                    |                    |                    |
|--------------------------------------|-------------------------------|-----------------------|--------------------|--------------------|--------------------|
|                                      |                               | (%)                   | 12-16 weeks<br>(%) | 20-24 weeks<br>(%) | 28-32 weeks<br>(%) |
| <b>ACR &lt; 20<br/>(No response)</b> | 53                            | 47                    | 44                 | 36                 | 33                 |
| <b>20 ≤ ACR &lt; 50</b>              | 31                            | 22                    | 22                 | 33                 | 25                 |
| <b>50 ≤ ACR &lt; 70</b>              | 6                             | 3                     | 14                 | 11                 | 25                 |
| <b>ACR ≥ 70</b>                      | 11                            | 28                    | 19                 | 19                 | 17                 |

'Before dose-escalation' was defined as the last assessment on or before the patient took the escalated dose. Number of patients included in the analysis (N=36); IR, inadequate response; TNF, tumor necrosis factor.
